# Supplementary material for: MicroRNA-200a induces immunosuppression by promoting PTEN-mediated PD-L1 upregulation in osteosarcoma
Source: publisher site journal article supplement (doi:10.18632/aging.102679), 2020-01-24
Supplement: Supplementary file [file aging-v12i2-102679-supplementary-material-SD1.pdf]

## SUPPLEMENTARY FIGURES

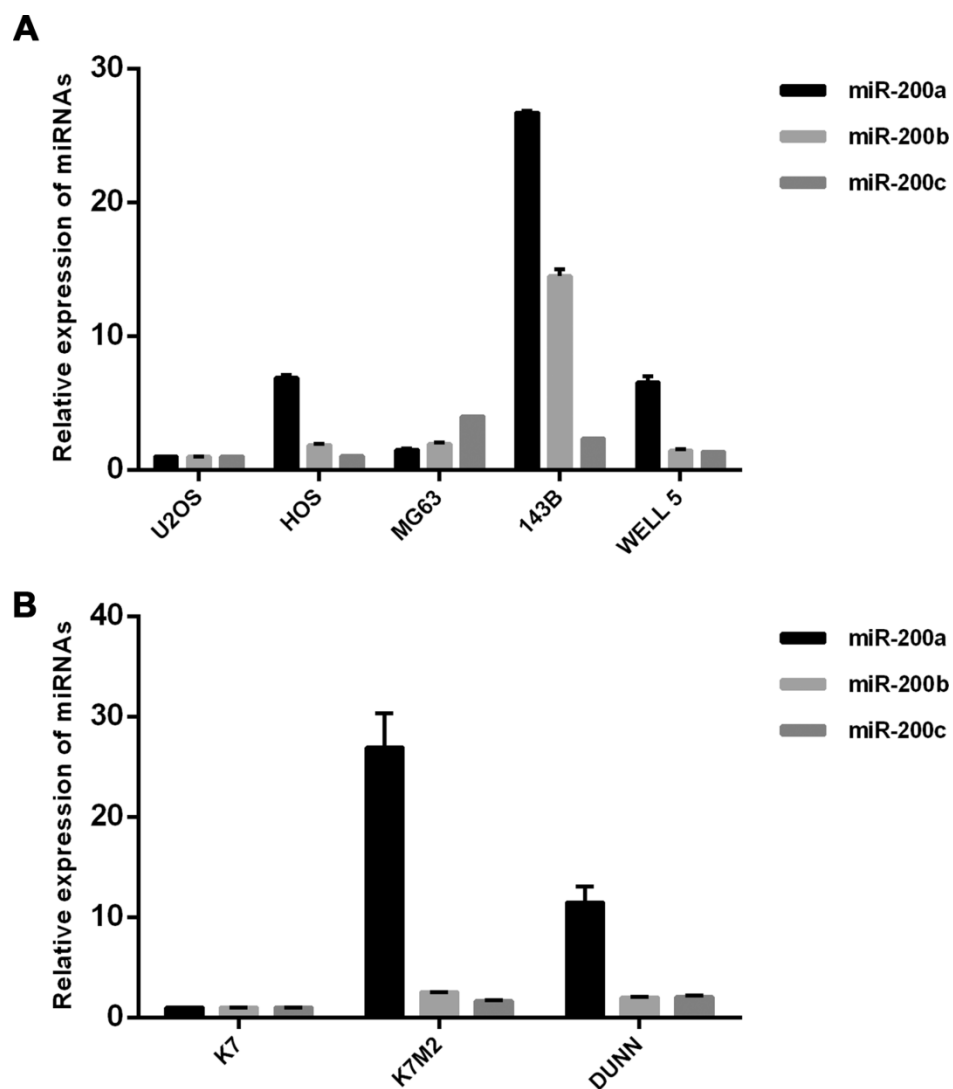

**Supplementary Figure 1. Expression of miR-200 family in human and mouse osteosarcoma cell lines.** (A) Expression of miR-200 family in human osteosarcoma cell lines. (B) Expression of miR-200 family in mouse osteosarcoma cell lines.

143B

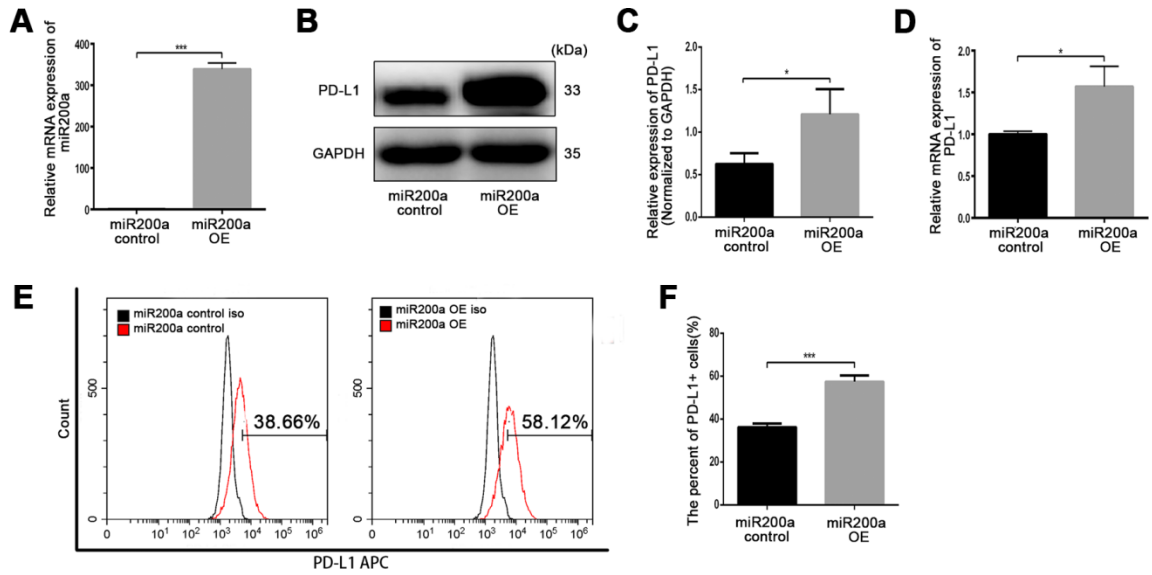

**Supplementary Figure 2. miR-200a up-regulated PD-L1 expression in 143B.** (A) qRT-PCR analysis of miR-200a in 143B miR-200a control and miR-200a OE. (B–C) Western blot analysis of PD-L1 in 143B miR-200a control and miR-200a OE. (D) qRT-PCR analysis of PD-L1 in 143B miR-200a control and miR-200a OE. (E–F) Flow cytometry analysis of PD-L1 in 143B miR-200a control and miR-200a OE. \*P<0.05, \*\*P<0.01, \*\*\*P<0.001.

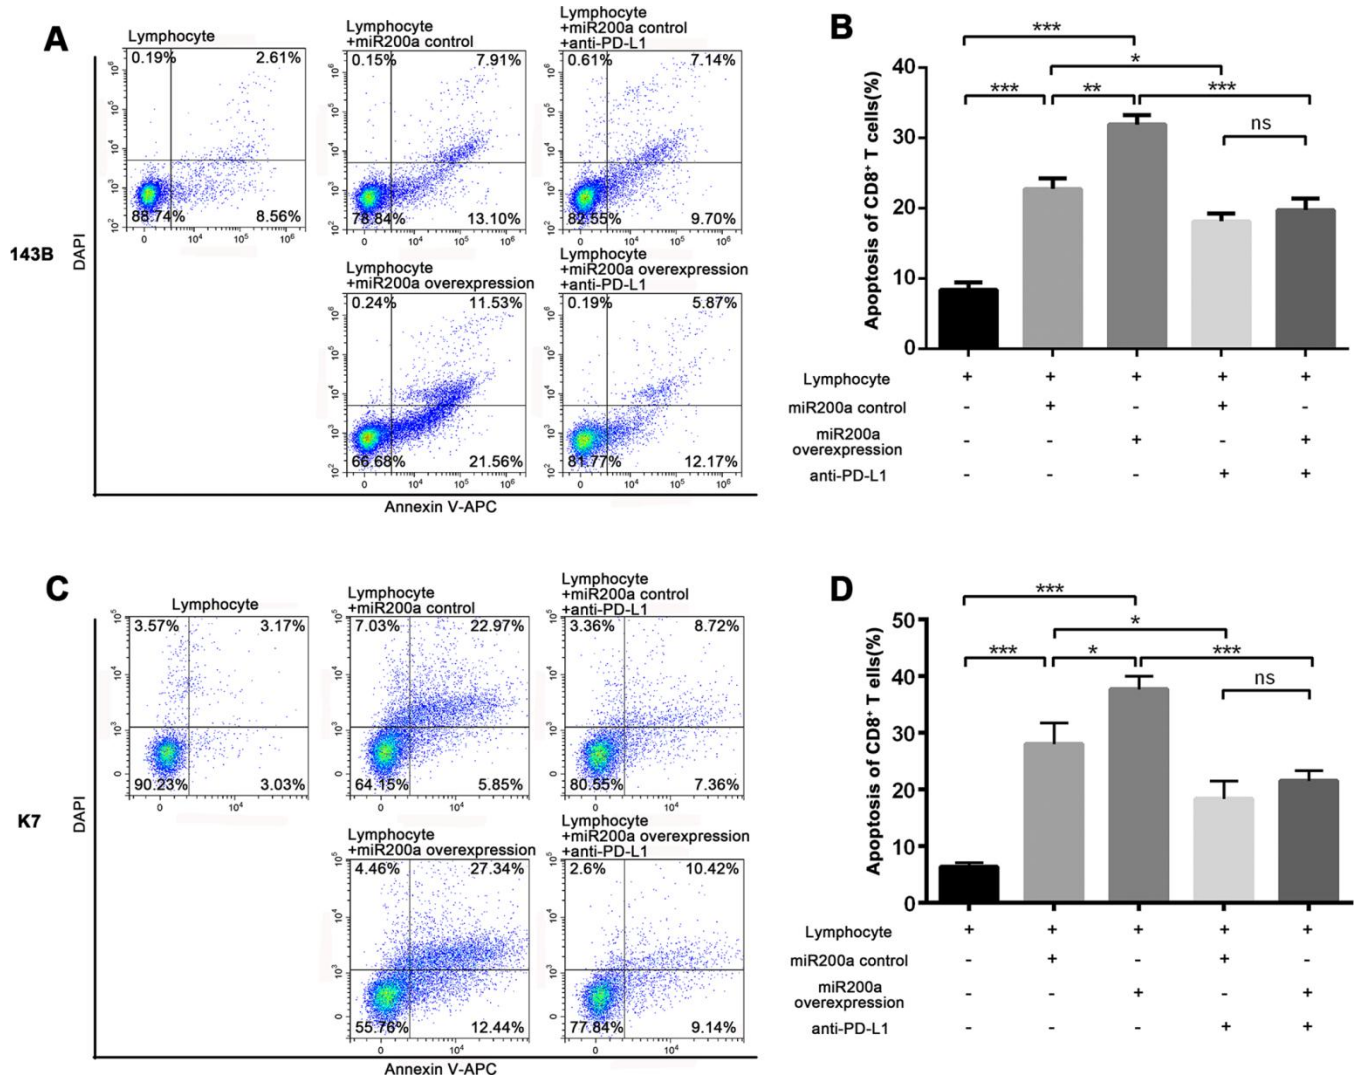

**Supplementary Figure 3. miR-200a promoted the apoptosis of CD8<sup>+</sup> T cells through PD-L1/PD-1 pathway *in vitro*.** (A–B) Examine the apoptosis of CD8<sup>+</sup> T cells after co-cultured with 143B miR-200a control or miR-200a OE. (C–D) Examine the apoptosis of CD8<sup>+</sup> T cells after co-cultured with K7 miR-200a control or miR-200a OE. \*P<0.05, \*\*P<0.01, \*\*\*P<0.001.

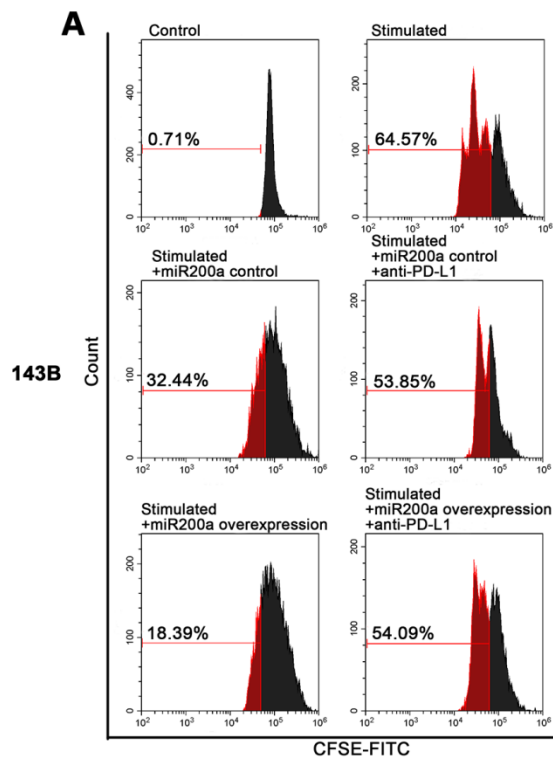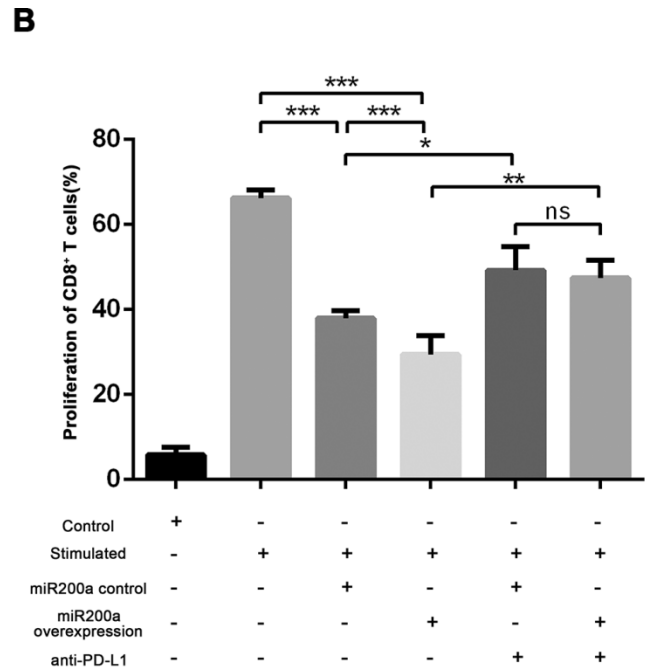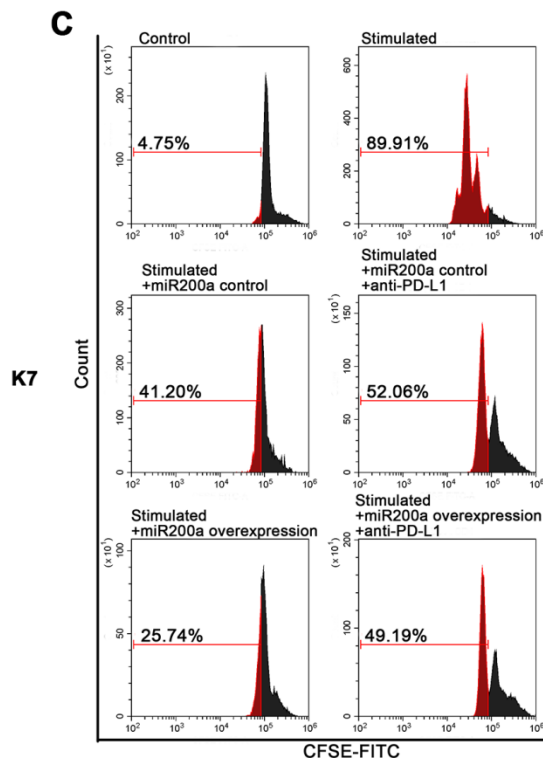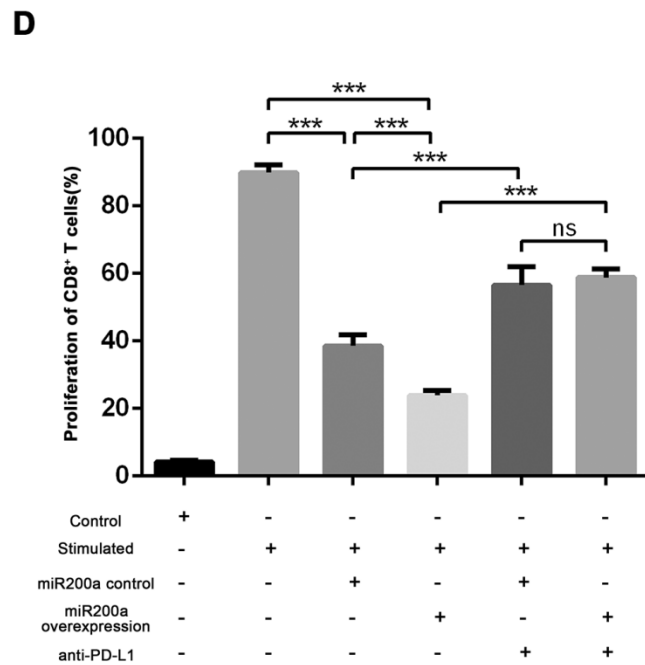

**Supplementary Figure 4. miR-200a inhibited the proliferation of CD8<sup>+</sup> T cells through PD-L1/PD-1 pathway *in vitro*.** (A–B) Examine the proliferation of CD8<sup>+</sup> T cells after co-cultured with 143B miR-200a control or miR-200a OE. (C–D) Examine the proliferation of CD8<sup>+</sup> T cells after co-cultured with K7 miR-200a control or miR-200a OE. \*P<0.05, \*\*P<0.01, \*\*\*P<0.001.

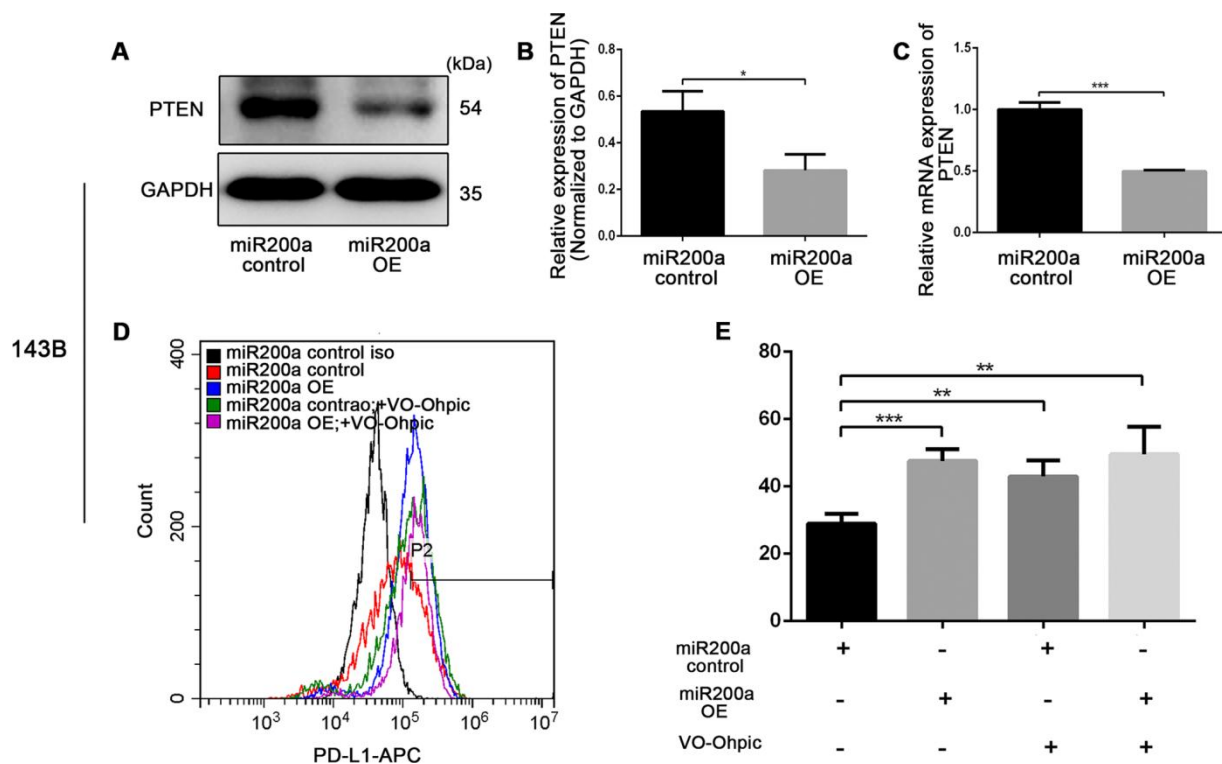

**Supplementary Figure 5. miR-200a up-regulated PD-L1 expression by targeting PTEN in 143B.** (A–B) Western blot analysis of PTEN in 143B miR-200a control and miR-200a OE. (C) qRT-PCR analysis of PTEN in 143B miR-200a control and miR-200a OE. (D–E) Flow cytometry analysis of PD-L1 expression of 143B miR-200a control and miR-200a OE after the addition of VO-Ohpic. \* $P < 0.05$ , \*\* $P < 0.01$ , \*\*\* $P < 0.001$ .

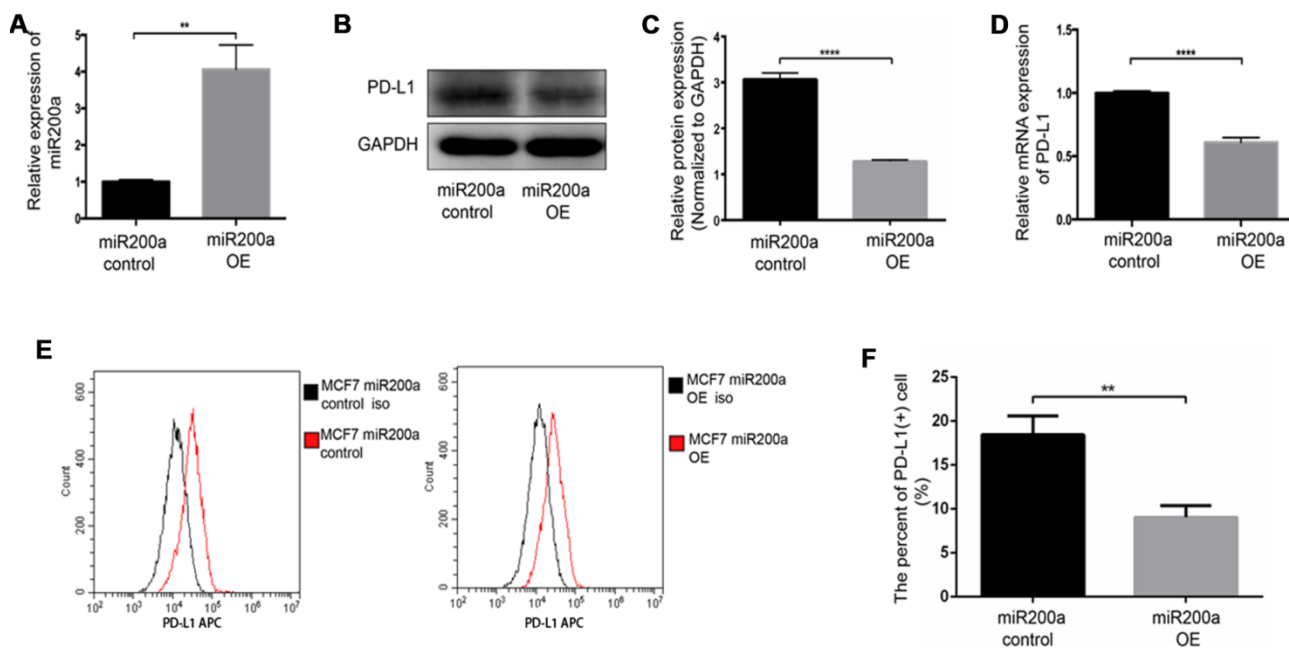

**Supplementary Figure 6. miR-200a inhibited PD-L1 expression in MCF7.** (A) qRT-PCR analysis of miR-200a in MCF7 miR-200a control and miR-200a OE. (B–C) Western blot analysis of PD-L1 in MCF7 miR-200a control and miR-200a OE. (D) qRT-PCR analysis of PD-L1 in MCF7 miR-200a control and miR-200a OE. (E–F) Flow cytometry analysis of PD-L1 in MCF7 miR-200a control and miR-200a OE. \* $P < 0.05$ , \*\* $P < 0.01$ , \*\*\* $P < 0.001$ .

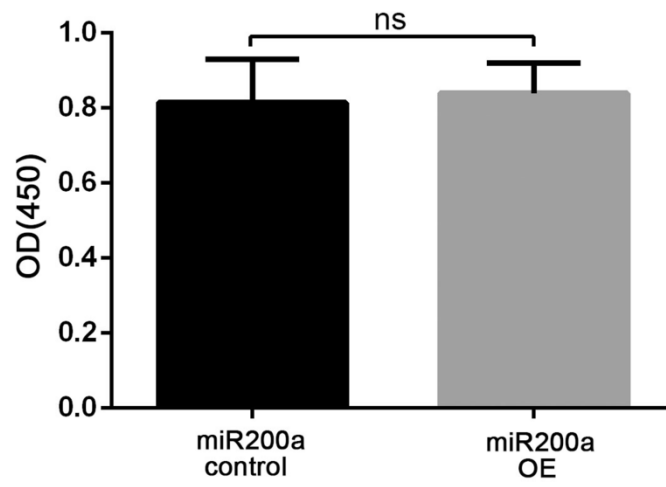

Supplementary Figure 7. Proliferative activity of K7 miR-200a control and miR-200a OE.
